# Supplementary material for: Estimating Drug Efficacy with a Diet-Induced NASH Model in Chimeric Mice with Humanized Livers
Source: MDPI journal article supplement (doi:10.3390/biomedicines9111647), 2021-11-09
Supplement: s1 [file s1]

Supplementary Figure S5

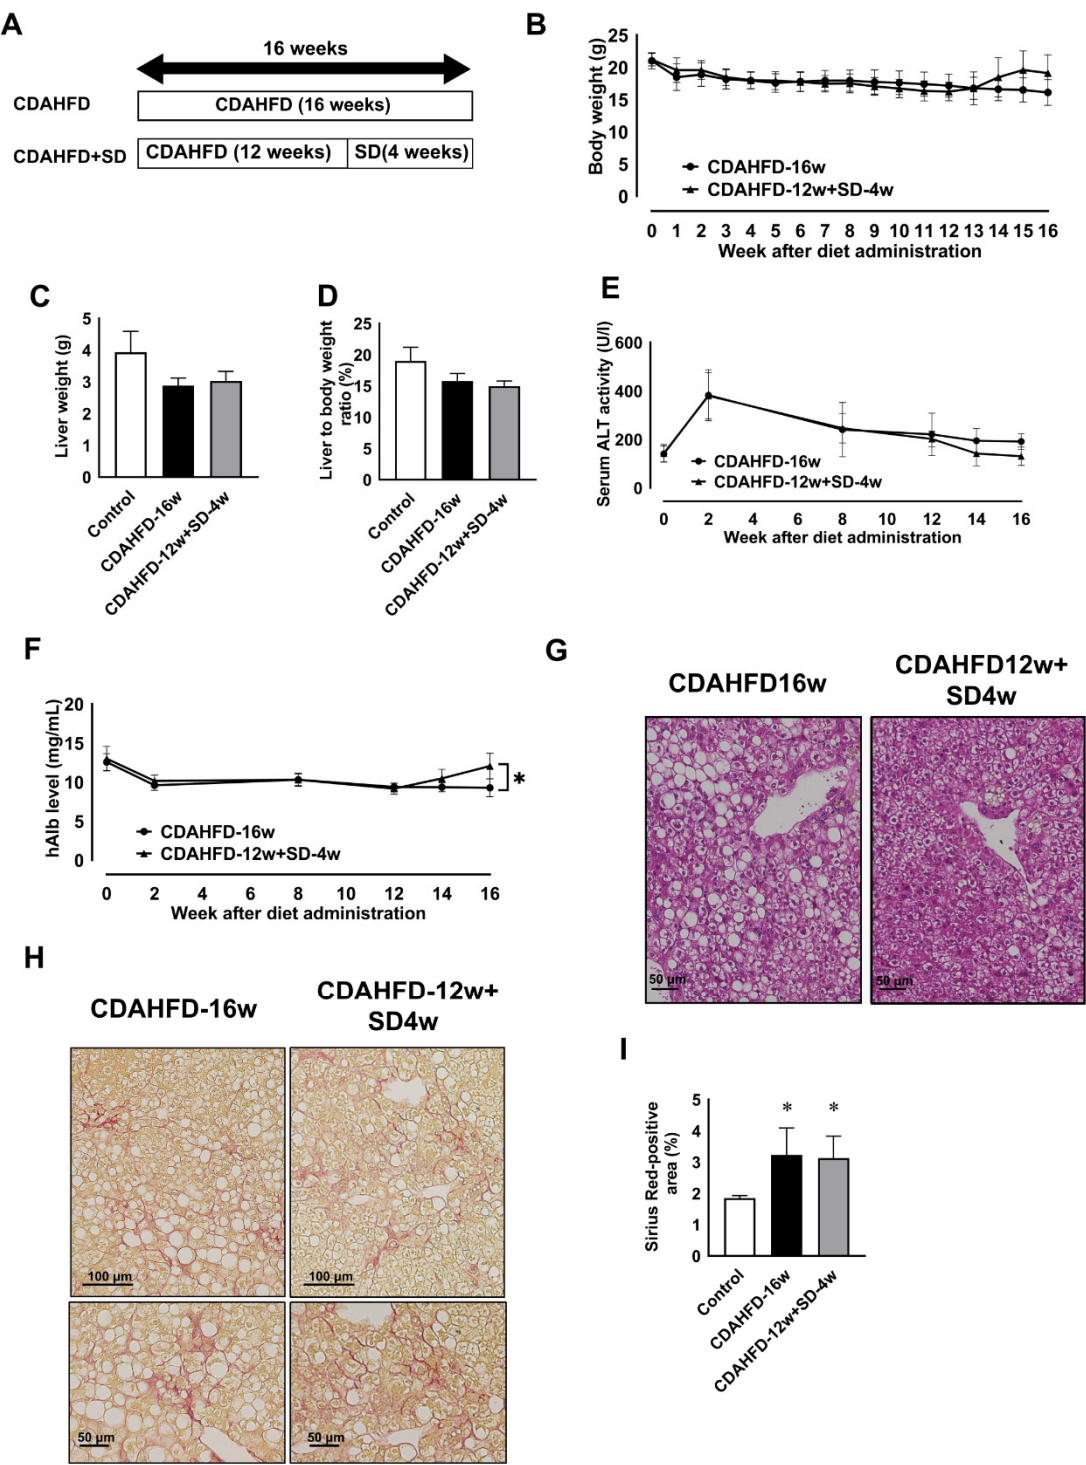

group and CDAHFD12w+SD-4w group. Representative images of H&E staining in the liver of mouse in CDAHFD-16w group or CDAHFD12w+SD-4w group (G). Scale bar; 50  $\mu$ m. Representative images of Sirius Red staining in the liver of mouse in CDAHFD-16w group and CDAHFD12w+SD-4w group (H). Scale bar; 100  $\mu$ m (upper), 50  $\mu$ m (lower). The ratio of Sirius Red-positive area in the liver of mouse in each group (I). Results are expressed as the mean  $\pm$  standard deviation (n = 4). Statistical comparison among multiple groups was evaluated by ANOVA, followed by Tukey's post hoc test. \*Significant difference from the control group ( $p < 0.05$ ).
