# Supplementary material for: Estimating Drug Efficacy with a Diet-Induced NASH Model in Chimeric Mice with Humanized Livers
Source: MDPI journal article supplement (doi:10.3390/biomedicines9111647), 2021-11-09
Supplement: s1 [file s1]

## Supplementary Figure S2

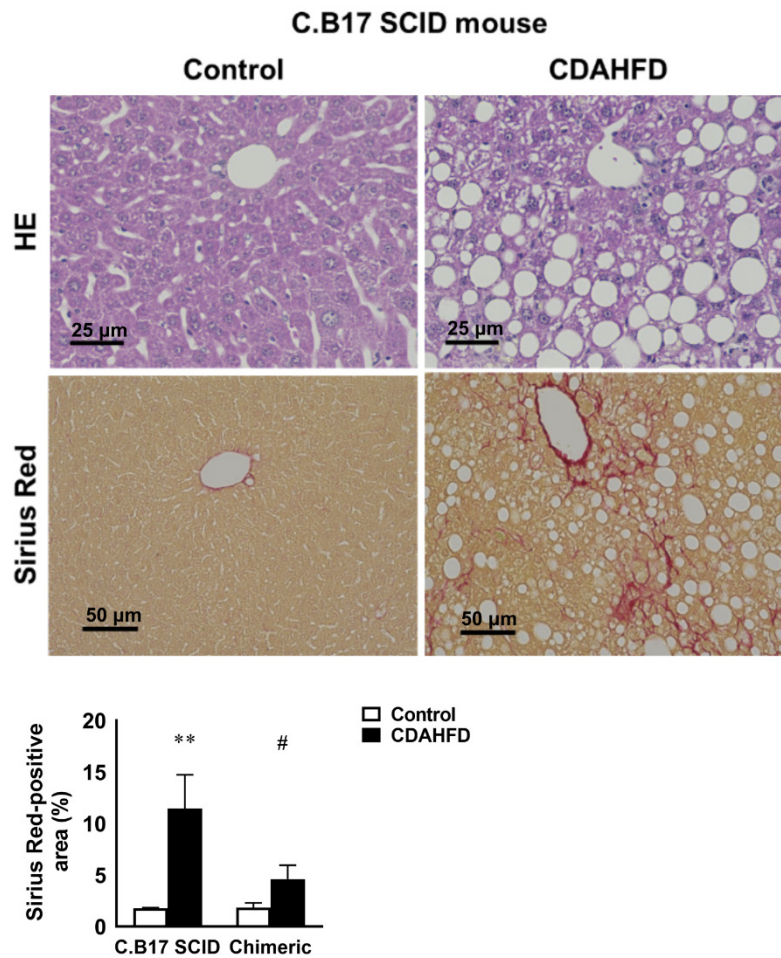

**Supplementary Figure S2 Histological changes in C.B17 SCID mice at 14 weeks after CDAHFD feeding.** Representative images of H&E staining (upper panel) and Sirius Red staining (lower panel) in the livers of standard diet or CDAHFD fed C.B17 SCID mouse (n = 4 per group). Scale bar: 25  $\mu$ m (upper panel) or 50  $\mu$ m (lower panel). The ratio of the Sirius Red-positive area in the livers of control or CDAHFD fed mice at 14 weeks. The open and closed bars show the control and CDAHFD-fed mice, respectively (n=4 per group). \*\*Significant difference from the control group ( $p < 0.01$ ). #Significant difference from the C.B17 SCID mice fed CDAHFD ( $p < 0.05$ ).
