# Supplementary material for: Estimating Drug Efficacy with a Diet-Induced NASH Model in Chimeric Mice with Humanized Livers
Source: MDPI journal article supplement (doi:10.3390/biomedicines9111647), 2021-11-09
Supplement: s1 [file s1]

### Supplementary Figure S3

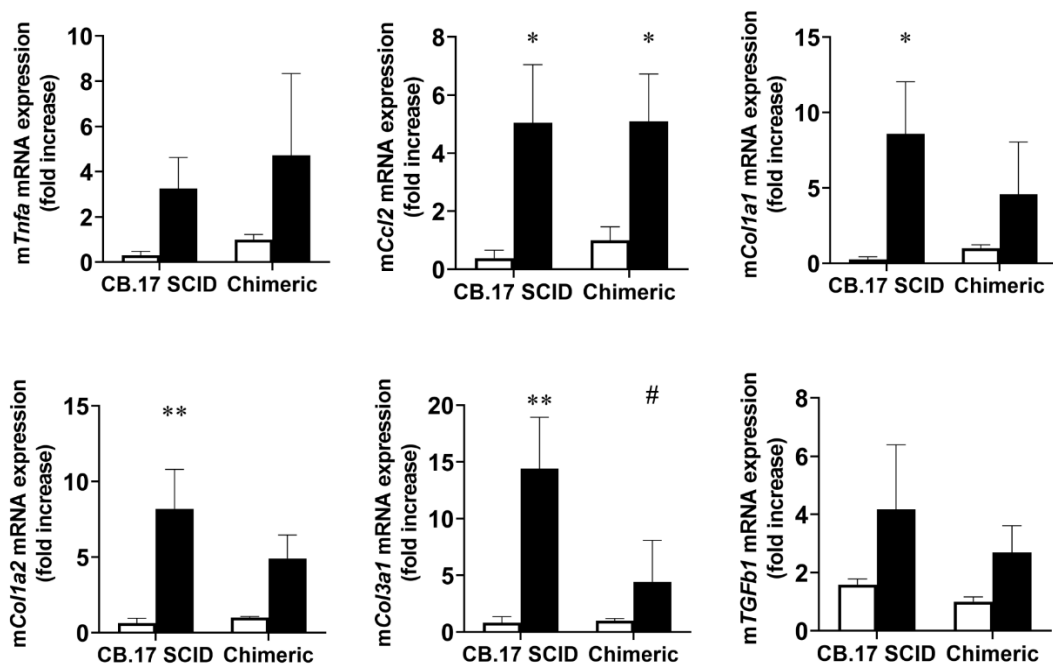

Supplementary Figure S3. Comparison of changes in inflammation and fibrosis-related gene expression in the C.B17 SCID and chimeric mice with h-heps at 14 weeks after CDAHFD feeding. Changes in the levels of inflammation and fibrosis-related gene expressions in the C.B17 SCID and chimeric mice with h-heps after CDAHFD feeding. Results are represented as the mean ratio of each value for standard diet fed chimeric mice  $\pm$  standard deviation (n=4 per group). Statistical comparison among multiple groups was evaluated using an ANOVA, followed by Tukey's post hoc test. \*Significant difference from the control group ( $p < 0.05$ ). \*\*Significant difference from the control group ( $p < 0.01$ ). #Significant difference from the C.B 17 SCID mice fed CDAHFD ( $p < 0.05$ ).
