# Supplementary material for: Estimating Drug Efficacy with a Diet-Induced NASH Model in Chimeric Mice with Humanized Livers
Source: MDPI journal article supplement (doi:10.3390/biomedicines9111647), 2021-11-09
Supplement: s1 [file s1]

## Supplementary Figure S4

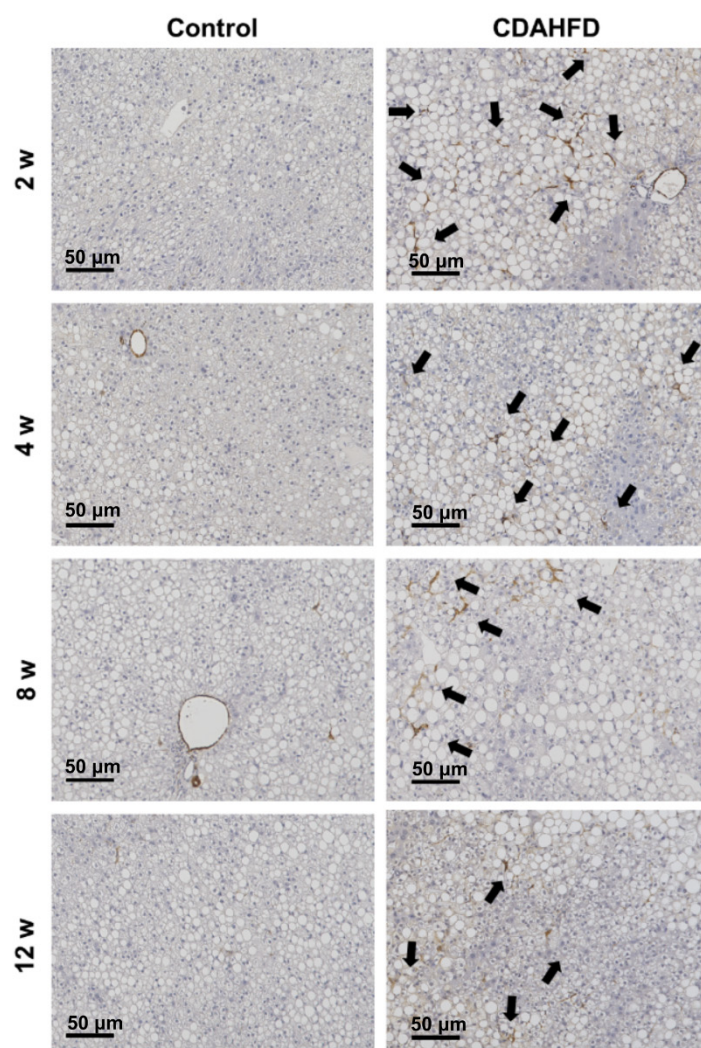

**Supplementary Figure S4. Activation of hepatic stellate cells in human chimeric mice after CDAHFD feeding.** Representative images of immunostaining with a  $\alpha$ SMA antibody of the livers of the control and CDAHFD groups at 2, 4, 8, and 12 weeks (n=3 per group). Scale bar: 50  $\mu$ m.
