# Supplementary material for: Estimating Drug Efficacy with a Diet-Induced NASH Model in Chimeric Mice with Humanized Livers
Source: MDPI journal article supplement (doi:10.3390/biomedicines9111647), 2021-11-09
Supplement: s1 [file s1]

**Supplemental Table S2. Primers used for qRT-PCR in this study**

| <b>gene</b>    |   | <b>sequence</b>         | <b>bp</b> |
|----------------|---|-------------------------|-----------|
| <i>mActa2</i>  | F | AGAGGAAGACAGCACAGCCC    | 20        |
|                | R | AGCGTCAGGATCCCTCTCTTG   | 21        |
| <i>mCcl2</i>   | F | ACTCTCACTGAAGCCAGCTC    | 20        |
|                | R | TGAGTAGCAGCAGTGAGTG     | 20        |
| <i>hCCL2</i>   | F | TCTCGCCTCCAGCATGAAAG    | 20        |
|                | R | GGCATTGATTGCATCTGGC     | 19        |
| <i>mCol1a1</i> | F | TGGCCAAGAAGACATCCCTG    | 20        |
|                | R | CGTGCCATTGTGGCAGATAC    | 20        |
| <i>mCol1a2</i> | F | TCTTGCTGGCCTACATGGTG    | 20        |
|                | R | CAGGTTGCCCAGATCTACCA    | 20        |
| <i>mCol3a1</i> | F | TGACTGTCCCACGTAAGCAC    | 20        |
|                | R | GAGGGCCATAGCTGAACTGA    | 20        |
| <i>hCOL1a1</i> | F | GGCCAAGACGAAGACATCCC    | 20        |
|                | R | ACAGATCACGTCATCGCACA    | 20        |
| <i>mCOL1a2</i> | F | GCTGTCATTCTACAGGGCTC    | 20        |
|                | R | CATTTGTCTTTTATAGAGCAGCC | 22        |
| <i>mCOL3a1</i> | F | GCATACATGGATCAGGCCAG    | 20        |
|                | R | ATTCCCCAGTGTGTTTCGTG    | 20        |
| <i>mCxcl1</i>  | F | TCTCCGTTACTTGGGGACAC    | 20        |
|                | R | CCACACTCAAGAATGGTCGC    | 20        |
| <i>hCXCL1</i>  | F | CTCTACCTGCACACTGTCCTA   | 21        |
|                | R | GCATGTTGCAGGCTCCTCAG    | 20        |
| <i>mCxcl2</i>  | F | TCCAGGTCAGTTAGCCTTGC    | 20        |
|                | R | CGGTCAAAAAGTTTGCCTTG    | 20        |
| <i>hCXCL2</i>  | F | GCTTGTCTCAACCCCGCATC    | 20        |
|                | R | AGCCACCAATAAGCTTCCTCC   | 21        |
| <i>mHo-1</i>   | F | AAGCCGAGAATGCTGAGTTCA   | 21        |
|                | R | GCCGTGTAGATATGGTACAAGGA | 23        |
| <i>hHO-1</i>   | F | CAACAAAGTGCAAGATTCTGCC  | 22        |
|                | R | TGGCATAAAGCCCTACAGCA    | 20        |
| <i>mMmp-8</i>  | F | CAACATTGCTTTCGTCTCAAGAG | 23        |
|                | R | GCATGGGCAAGGATTCCATT    | 20        |

|                |   |                         |    |
|----------------|---|-------------------------|----|
| <i>hMMP-8</i>  | F | TGCTCTTACTCCATGTGCAGA   | 21 |
|                | R | TCCAGGTAGTCCTGAACAGTTT  | 22 |
| <i>mMmp-9</i>  | F | GCAGAGGCATACTTGTACCG    | 20 |
|                | R | TGATGTTATGATGGTCCCCTTG  | 23 |
| <i>hMmp-9</i>  | F | GGGACGCAGACATCGTCATC    | 20 |
|                | R | TCGTCATCGTCGAAATGGGC    | 20 |
| <i>mSOD-1</i>  | F | AACCAGTTGTGTTGTCAGGAC   | 21 |
|                | R | CCACCATGTTTCTTAGAGTGAGG | 23 |
| <i>hSOD-1</i>  | F | GGTGGGCCAAAGGATGAAGAG   | 21 |
|                | R | CCACAAGCCAAACGACTTCC    | 20 |
| <i>mTimp-1</i> | F | CTTGGTTCCTGGCGTACTC     | 20 |
|                | R | ACCTGATCCGTCCACAAACAG   | 21 |
| <i>hTIMP-1</i> | F | CTTCTGCAATTCCGACCTCGT   | 21 |
|                | R | ACGCTGGTATAAGGTGGTCTG   | 21 |
| <i>mTgf-b1</i> | F | ACGTCACTGGAGTTGTACGG    | 20 |
|                | R | TTTGGGGCTGATCCCGTTG     | 19 |
| <i>hTGF-B1</i> | F | GGTGGAAACCCACAACGAAATC  | 22 |
|                | R | GGGTTTCAGGTACCGCTTCTC   | 20 |
| <i>mTnf-a</i>  | F | ACGTCGTAGCAAACCACCAA    | 20 |
|                | R | ACAAGGTACAACCCATCGGC    | 20 |
| <i>hTNF-A</i>  | F | GCTGCACTTTGGAGTGATCG    | 20 |
|                | R | AAGATGATCTGACTGCCTGGG   | 21 |

---

F: forward primer, R: reverse primer
