# Supplementary material for: Estimating Drug Efficacy with a Diet-Induced NASH Model in Chimeric Mice with Humanized Livers
Source: MDPI journal article supplement (doi:10.3390/biomedicines9111647), 2021-11-09
Supplement: s1 [file s1]

# **Estimating drug efficacy with a diet-induced NASH model in chimeric mice with humanized livers**

## **Running head: NASH model using human liver chimeric mice**

Keishi Kiso<sup>1§</sup>, Go Sugahara<sup>1§</sup>, Yuko Ogawa<sup>1</sup>, Suzue Furukawa<sup>1</sup>, Yuji Ishida<sup>1,2</sup>, Takeshi Okanoue<sup>3</sup>, Michinori Kohara<sup>4</sup>,  
Chise Tateno<sup>1,2\*</sup>

<sup>§</sup>These authors have equally contributed to this study.

### **Affiliation**

<sup>1</sup>Research and Development Department, PhoenixBio Co., Ltd., 3-4-1 Kagamiyama, Higashihiroshima, 739-0046, Japan.

<sup>2</sup>Research Center for Hepatology and Gastroenterology, Hiroshima University, 1-2-3 Kasumi, Minami-ku, Hiroshima 734-8551, Japan

<sup>3</sup>Department of Gastroenterology and Hepatology, Saiseikai Suita Hospital, 1-2 Kawazonocho, Suita, 564-0013, Japan

<sup>4</sup>Department of Microbiology and Cell Biology, Tokyo Metropolitan Institute of Medical Science, Setagaya-ku, Tokyo 156-8506, Japan

### **Address for Correspondence:**

Chise Tateno

Research and Development Department, PhoenixBio Co., Ltd., 3-4-1 Kagamiyama, Higashi-hiroshima, 739-0046, Japan.

Tel: +81-82-431-0016

E-mail: [chise.mukaidani@phoenixbio.co.jp](mailto:chise.mukaidani@phoenixbio.co.jp)

## **Supplementary Methods**

### ***Generation of a CDAHFD-induced NASH model using C.B17 SCID mice***

Chimeric mice (15 to 18-week-old, male) with h-heps {(IVT-JFC: 1-year-old Caucasian male, purchased from Bio-IVT (Westbury, NY, USA)) and C.B17 SCID mice (6-week-old, male, Charles River Japan, Yokohama, Japan) were fed a CDAHFD or standard diet for 14 weeks.

### ***Restoration study***

Study design is shown in supplemental Figure 5A. The chimeric mice were given CDAHFD for 12 weeks and then returned to a standard diet or continued a CDAHFD for 4 weeks. (n = 4 per group).
