# Supplementary material for: Estimating Drug Efficacy with a Diet-Induced NASH Model in Chimeric Mice with Humanized Livers
Source: MDPI journal article supplement (doi:10.3390/biomedicines9111647), 2021-11-09
Supplement: s1 [file s1]

**Supplementary Table S1. Antibodies used for Immunohistochemistry in this study**

| <b>Antibody</b>                     | <b>clone</b> | <b>dilution</b> | <b>Cat No.</b> | <b>Supplier</b> |
|-------------------------------------|--------------|-----------------|----------------|-----------------|
| rat monoclonal anti-F4/80           | BM8          | 200             | T-2006         | BMA Biomedicals |
| rat monoclonal anti-Gr1             | RB6-8C5      | 200             | 550291         | BD Pharmingen   |
| mouse monoclonal anti-Ki67          | MIB-1        | 200             | M7240          | Dako            |
| mouse monoclonal anti- $\alpha$ SMA | 1A4          | 200             | A2547          | Sigma Aldrich   |
| mouse monoclonal anti-STEM121       | -            | 1000            | Y40410         | Takara Bio Inc  |
